# Supplementary material for: A Review on Mycotoxins and Microfungi in Spices in the Light of the Last Five Years
Source: PubMed Central journal article supplement (PMC7763258; doi:10.3390/toxins12120789), 2020-12-11
Supplement: toxins-12-00789-s001.pdf [file toxins-12-00789-s001.pdf]

# Supplementary Materials: A Review on Mycotoxins and Microfungi in Spices in the Light of the Last Five Years

Darina Pickova, Vladimir Ostry, Jan Malir, Jakub Toman and Frantisek Malir

**Table S1.** Studies positivity: Natural occurrence of mycotoxins produced by *Aspergillus* and *Penicillium* species in spices in the last 5 years (since 2015).

| Mycotoxin <sup>a</sup> /<br>Spice | AFB <sub>1</sub>             |                | AFB <sub>2</sub> |   | AFG <sub>1</sub> |    | AFG <sub>2</sub> |      | AFs             |   | OTA             |     | CIT             |      | Reference |   |      |    |   |     |   |                                               |
|-----------------------------------|------------------------------|----------------|------------------|---|------------------|----|------------------|------|-----------------|---|-----------------|-----|-----------------|------|-----------|---|------|----|---|-----|---|-----------------------------------------------|
|                                   | Positive <sup>b</sup><br>(%) | n <sup>c</sup> | Positive<br>(%)  | n | Positive<br>(%)  | n  | Positive<br>(%)  | n    | Positive<br>(%) | n | Positive<br>(%) | n   | Positive<br>(%) | n    |           |   |      |    |   |     |   |                                               |
| Allspice                          | -                            | -              | 0                | - | -                | -  | 0                | -    | -               | 0 | ●               | 100 | 1               | ×    | 0.0       | 1 | -    | -  | 0 | [9] |   |                                               |
| Anise                             | ●                            | 100            | 2                | × | 0.0              | 1  | ●                | 100  | 1               | × | 0.0             | 1   | ●               | 100  | 1         | - | -    | 0  | - | -   | 0 | [9,109,111,122]                               |
| Basil                             | ×                            | 0.0            | 2                | - | -                | 0  | -                | -    | 0               | × | 0.0             | 1   | ×               | 0.0  | 2         | × | 0.0  | 1  | - | -   | 0 | [9,110,123]                                   |
| Bay leaf                          | ×                            | 0.0            | 3                | × | 0.0              | 2  | ●                | 50.0 | 2               | ● | 50.0            | 2   | ●               | 50.0 | 4         | × | 0.0  | 1  | - | -   | 0 | [9,110,122,124]                               |
| Caraway                           | ●                            | 40.0           | 5                | ● | 50.0             | 4  | ○                | 25.0 | 4               | ○ | 25.0            | 4   | ●               | 50.0 | 6         | ● | 66.7 | 3  | × | 0.0 | 1 | [8,9,120,124–126]                             |
| Cardamom                          | ×                            | 0.0            | 2                | × | 0.0              | 1  | ×                | 0.0  | 1               | × | 0.0             | 1   | ●               | 60.0 | 5         | ● | 66.7 | 3  | - | -   | 0 | [9,109,119,122,126,127]                       |
| Carom                             | ●                            | 100            | 1                | × | 0.0              | 1  | ×                | 0.0  | 1               | × | 0.0             | 1   | ●               | 100  | 1         | - | -    | 0  | - | -   | 0 | [125]                                         |
| Chili                             | ●                            | 95.7           | 23               | ● | 75.0             | 12 | ●                | 50.0 | 12              | ● | 45.5            | 11  | ●               | 96.3 | 27        | ● | 85.7 | 14 | ● | 100 | 2 | [8,9,106,108,110–118,120–122,128–138,147,148] |
| Cinnamon                          | ●                            | 50.0           | 8                | ○ | 20.0             | 5  | ●                | 40.0 | 5               | ○ | 20.0            | 5   | ●               | 57.1 | 7         | ● | 33.3 | 3  | - | -   | 0 | [9,110–112,116,121,122,125,127,131]           |
| Cloves                            | ×                            | 0.0            | 2                | × | 0.0              | 1  | ×                | 0.0  | 1               | × | 0.0             | 1   | ●               | 40.0 | 5         | × | 0.0  | 3  | - | -   | 0 | [9,35,122,127,131,147,148]                    |
| Coriander                         | ●                            | 57.1           | 7                | ● | 50.0             | 6  | ●                | 33.3 | 6               | ● | 33.3            | 6   | ●               | 62.5 | 8         | ● | 75.0 | 4  | ● | 100 | 1 | [8,9,109,111,112,120,124,125]                 |
| Cumin                             | ●                            | 57.1           | 7                | ● | 40.0             | 5  | ●                | 60.0 | 5               | ● | 40.0            | 5   | ●               | 66.7 | 6         | ● | 66.7 | 3  | ● | 100 | 1 | [8,9,109–112,122,125]                         |
| Cumin, black                      | ●                            | 66.7           | 3                | ● | 50.0             | 2  | ●                | 100  | 2               | ● | 50.0            | 2   | ●               | 100  | 2         | - | -    | 0  | - | -   | 0 | [109,110,125]                                 |
| Curry                             | ●                            | 100            | 1                | ● | 100              | 1  | ●                | 100  | 1               | ● | 100             | 1   | ●               | 33.3 | 3         | ● | 100  | 1  | - | -   | 0 | [112,147,148]                                 |
| Dawadawa                          | ●                            | 100            | 1                | - | -                | 0  | -                | -    | 0               | - | -               | 0   | ●               | 100  | 1         | ● | 100  | 1  | - | -   | 0 | [130]                                         |
| Fennel                            | ●                            | 40.0           | 10               | ● | 28.6             | 7  | ●                | 42.9 | 7               | ● | 28.6            | 7   | ●               | 60.0 | 10        | ● | 60.0 | 5  | × | 0.0 | 1 | [8,9,109–112,124–127,131]                     |
| Fenugreek                         | ●                            | 50.0           | 2                | ● | 50.0             | 2  | ●                | 100  | 2               | ● | 50.0            | 2   | ●               | 100  | 3         | ● | 50.0 | 2  | ● | 100 | 1 | [8,9,109]                                     |
| Garlic                            | -                            | -              | 0                | - | -                | 0  | -                | -    | 0               | - | -               | 0   | ×               | 0.0  | 3         | ● | 100  | 1  | - | -   | 0 | [9,147,148]                                   |
| Ginger                            | ●                            | 100            | 8                | ● | 60.0             | 5  | ●                | 40.0 | 5               | ● | 40.0            | 5   | ●               | 81.8 | 11        | ● | 83.3 | 6  | ● | 100 | 1 | [8,9,109–111,117,120,122,130,139,140,147,148] |
| Licorice                          | ●                            | 50.0           | 2                | × | 0.0              | 2  | ●                | 50.0 | 2               | × | 0.0             | 2   | ●               | 50.0 | 2         | ● | 100  | 2  | ● | 100 | 1 | [109,120,141]                                 |
| Mace                              | -                            | -              | 0                | - | -                | 0  | -                | -    | 0               | - | -               | 0   | ●               | 100  | 1         | ● | 100  | 1  | - | -   | 0 | [126]                                         |
| Marjoram                          | ●                            | 100            | 1                | × | 0.0              | 1  | ×                | 0.0  | 1               | × | 0.0             | 1   | ●               | 50.0 | 2         | ● | 100  | 1  | - | -   | 0 | [9,109]                                       |
| Mint                              | ×                            | 0.0            | 3                | × | 0.0              | 2  | ×                | 0.0  | 2               | × | 0.0             | 2   | ×               | 0.0  | 3         | × | 0.0  | 1  | - | -   | 0 | [9,110,124]                                   |
| Mustard                           | ●                            | 50.0           | 2                | × | 0.0              | 1  | ●                | 100  | 1               | ● | 100             | 1   | ●               | 100  | 1         | ● | 100  | 1  | - | -   | 0 | [109,120,127]                                 |
| Nutmeg                            | ●                            | 33.3           | 6                | ● | 50.0             | 2  | ●                | 50.0 | 2               | × | 0.0             | 2   | ●               | 85.7 | 7         | ● | 100  | 3  | × | 0.0 | 1 | [9,105,109,120,123,127,135,147,148,152,153]   |
| Onion                             | ×                            | 0.0            | 1                | - | -                | 0  | ×                | 0.0  | 1               | - | -               | 0   | ×               | 0.0  | 2         | × | 0.0  | 2  | - | -   | 0 | [9,133]                                       |

| Mycotoxin <sup>a</sup> /<br>Spice | AFB <sub>1</sub>             |                | AFB <sub>2</sub> |   | AFG <sub>1</sub> |   | AFG <sub>2</sub> |   | AFs             |    | OTA             |    | CIT             |   | Reference                                            |
|-----------------------------------|------------------------------|----------------|------------------|---|------------------|---|------------------|---|-----------------|----|-----------------|----|-----------------|---|------------------------------------------------------|
|                                   | Positive <sup>b</sup><br>(%) | n <sup>c</sup> | Positive<br>(%)  | n | Positive<br>(%)  | n | Positive<br>(%)  | n | Positive<br>(%) | n  | Positive<br>(%) | n  | Positive<br>(%) | n |                                                      |
| Oregano                           | × 0.0                        | 4              | × 0.0            | 3 | × 0.0            | 3 | × 0.0            | 3 | ○ 25.0          | 4  | × 0.0           | 3  | × 0.0           | 1 | [9,123,124,131]                                      |
| Paprika                           | ● 100                        | 3              | ● 100            | 1 | ● 100            | 2 | ● 100            | 1 | ● 100           | 4  | ● 100           | 4  | - -             | 0 | [9,107,111,120,133]                                  |
| Parsley                           | ● 100                        | 1              | ● 100            | 1 | ● 100            | 1 | × 0.0            | 1 | ● 50.0          | 2  | × 0.0           | 1  | - -             | 0 | [9,109]                                              |
| Pepper, black                     | ● 64.3                       | 14             | ● 57.1           | 7 | ● 42.9           | 7 | ● 28.6           | 7 | ● 73.3          | 15 | ● 66.7          | 12 | ● 66.7          | 3 | [8,9,35,108–112,116–118,120–123,125–127,129–131,134] |
| Pepper, white                     | ● 33.3                       | 3              | ● 33.3           | 3 | ● 33.3           | 3 | ● 33.3           | 3 | ● 50.0          | 4  | ○ 25.0          | 4  | - -             | 0 | [9,35,112,125,131]                                   |
| Rosemary                          | ● 50.0                       | 4              | ● 50.0           | 4 | ○ 25.0           | 4 | ● 50.0           | 4 | ● 100           | 5  | ● 50.0          | 2  | - -             | 0 | [9,109,124,131]                                      |
| Saffron                           | ● 100                        | 1              | - -              | 0 | - -              | 0 | - -              | 0 | ● 50.0          | 2  | × 0.0           | 1  | - -             | 0 | [9,111]                                              |
| Sage                              | ● 50.0                       | 2              | × 0.0            | 1 | ● 100            | 1 | × 0.0            | 1 | ● 100           | 3  | ● 100           | 1  | - -             | 0 | [9,109,110]                                          |
| Star anise                        | × 0.0                        | 1              | - -              | 0 | - -              | 0 | - -              | 0 | - -             | 0  | - -             | 0  | - -             | 0 | [127]                                                |
| Sumac                             | × 0.0                        | 1              | - -              | 0 | - -              | 0 | - -              | 0 | × 0.0           | 1  | × 0.0           | 1  | - -             | 0 | [9,110]                                              |
| Thyme                             | ● 40.0                       | 5              | × 0.0            | 3 | ● 33.3           | 3 | × 0.0            | 3 | ● 42.9          | 7  | × 0.0           | 2  | × 0.0           | 1 | [9,109,110,123,124,147,148]                          |
| Turmeric                          | ● 85.7                       | 7              | ● 66.7           | 6 | ● 66.7           | 6 | ○ 16.7           | 6 | ● 77.8          | 9  | ● 100           | 5  | × 0.0           | 1 | [8,9,109,110,112,116,121,122,125,126]                |

Notes: <sup>a</sup> AFB<sub>1</sub> = Aflatoxin B<sub>1</sub>, AFB<sub>2</sub> = Aflatoxin B<sub>2</sub>, AFG<sub>1</sub> = Aflatoxin G<sub>1</sub>, AFG<sub>2</sub> = Aflatoxin G<sub>2</sub>, AFs = Aflatoxins, OTA = Ochratoxin A, CIT = Citrinin; <sup>b</sup> Positive = the percentage of studies with at least one related spice sample positive on related mycotoxin; <sup>c</sup> n = number of studies concerning related spice and mycotoxin; × = none occurrence (0 %); ☆ = rare occurrence (up to 5 %); ○ = low occurrence (up to 25 %); ● = moderate occurrence (up to 50 %); ● = high occurrence (up to 75 %); ● = very high occurrence (more than 75 %).

**Table S2.** Studies positivity: Natural occurrence of *Fusarium* mycotoxins in spices in the last 5 years (since 2015).

| Mycotoxin <sup>a</sup> /<br>Spice | FB <sub>1</sub>              |                | FB <sub>2</sub> |   | DON             |   | NIV             |     | T-2             |   | HT-2            |   | ZEA             |      | Reference |           |     |   |               |     |   |               |
|-----------------------------------|------------------------------|----------------|-----------------|---|-----------------|---|-----------------|-----|-----------------|---|-----------------|---|-----------------|------|-----------|-----------|-----|---|---------------|-----|---|---------------|
|                                   | Positive <sup>b</sup><br>(%) | n <sup>c</sup> | Positive<br>(%) | n | Positive<br>(%) | n | Positive<br>(%) | n   | Positive<br>(%) | n | Positive<br>(%) | n | Positive<br>(%) | n    |           |           |     |   |               |     |   |               |
| Basil                             | ×                            | 0.0            | 2               | × | 0.0             | 1 | ×               | 0.0 | 1               | × | 0.0             | 1 | ×               | 0.0  | 1         | [123,143] |     |   |               |     |   |               |
| Bay leaf                          | ×                            | 0.0            | 3               | × | 0.0             | 1 | -               | -   | 0               | - | -               | 0 | ×               | 0.0  | 2         | -         | -   | 0 | [124,143]     |     |   |               |
| Caraway                           | ×                            | 0.0            | 2               | - | -               | 0 | -               | -   | 0               | - | -               | 0 | ×               | 0.0  | 2         | -         | -   | 0 | [124]         |     |   |               |
| Chili                             | ×                            | 0.0            | 1               | ● | 100             | 2 | -               | -   | 0               | - | -               | 0 | -               | -    | 0         | ×         | 0.0 | 1 | [118,133,137] |     |   |               |
| Coriander                         | ×                            | 0.0            | 3               | × | 0.0             | 1 | -               | -   | 0               | - | -               | 0 | ●               | 50.0 | 2         | ×         | 0.0 | 2 | -             | -   | 0 | [124,143]     |
| Dawadawa                          | ●                            | 100            | 1               | ● | 100             | 1 | ×               | 0.0 | 1               | × | 0.0             | 1 | ●               | 100  | 1         | ●         | 100 | 1 | ●             | 100 | 1 | [34]          |
| Fennel                            | ×                            | 0.0            | 2               | - | -               | 0 | -               | -   | 0               | - | -               | 0 | ×               | 0.0  | 2         | ×         | 0.0 | 2 | -             | -   | 0 | [124]         |
| Garlic                            | ●                            | 100            | 1               | × | 0.0             | 1 | -               | -   | 0               | - | -               | 0 | -               | -    | 0         | -         | -   | 0 | -             | -   | 0 | [142]         |
| Licorice                          | ●                            | 100            | 1               | × | 0.0             | 1 | ●               | 100 | 1               | - | -               | 0 | ×               | 0.0  | 1         | -         | -   | 0 | ●             | 100 | 1 | [141]         |
| Mint                              | ●                            | 33.3           | 3               | × | 0.0             | 1 | -               | -   | 0               | - | -               | 0 | ●               | 50.0 | 2         | ×         | 0.0 | 2 | -             | -   | 0 | [124,143]     |
| Nutmeg                            | ●                            | 100            | 1               | - | -               | 0 | ×               | 0.0 | 1               | × | 0.0             | 1 | ×               | 0.0  | 1         | ×         | 0.0 | 1 | ×             | 0.0 | 1 | [123]         |
| Onion                             | ●                            | 100            | 1               | ● | 100             | 1 | -               | -   | 0               | - | -               | 0 | -               | -    | 0         | -         | -   | 0 | -             | -   | 0 | [133]         |
| Oregano                           | ×                            | 0.0            | 3               | - | -               | 0 | ×               | 0.0 | 1               | × | 0.0             | 1 | ×               | 0.0  | 3         | ×         | 0.0 | 3 | ×             | 0.0 | 1 | [123,124]     |
| Paprika                           | ●                            | 50.0           | 2               | ● | 100             | 2 | ●               | 100 | 1               | ● | 100             | 1 | ●               | 100  | 1         | ●         | 100 | 1 | ●             | 100 | 1 | [107,133]     |
| Pepper, black                     | ●                            | 50.0           | 2               | - | -               | 0 | ×               | 0.0 | 1               | × | 0.0             | 1 | ×               | 0.0  | 1         | ×         | 0.0 | 1 | ×             | 0.0 | 1 | [118,123]     |
| Rosemary                          | ×                            | 0.0            | 2               | - | -               | 0 | -               | -   | 0               | - | -               | 0 | ×               | 0.0  | 2         | ×         | 0.0 | 2 | -             | -   | 0 | [124]         |
| Thyme                             | ○                            | 25.0           | 4               | × | 0.0             | 1 | ●               | 100 | 1               | × | 0.0             | 1 | ×               | 0.0  | 3         | ×         | 0.0 | 3 | ●             | 100 | 1 | [123,124,143] |

Notes: <sup>a</sup> FB<sub>1</sub> = fumonisin B<sub>1</sub>, FB<sub>2</sub> = Fumonisin B<sub>2</sub>, DON = Deoxynivalenol, NIV = Nivalenol, T-2 = T-2 toxin, HT-2 = HT-2 toxin, ZEA = Zearalenone; <sup>b</sup> Positive = the percentage of studies with at least one related spice sample positive on related mycotoxin; <sup>c</sup> n = number of studies concerning related spice and mycotoxin; × = none occurrence (0 %); ☆ = rare occurrence (up to 5 %); ○ = low occurrence (up to 25 %); ● = moderate occurrence (up to 50 %); ● = high occurrence (up to 75 %); ● = very high occurrence (more than 75 %).

**Table S3.** Studies positivity: Natural occurrence of *Alternaria* mycotoxins in spices in the last 5 years (since 2015).

| Mycotoxin <sup>a</sup> /<br>Spice | ALT                          |     |                | AOH             |     |   | TEA             |     |   | Reference |
|-----------------------------------|------------------------------|-----|----------------|-----------------|-----|---|-----------------|-----|---|-----------|
|                                   | Positive <sup>b</sup><br>(%) |     | n <sup>c</sup> | Positive<br>(%) |     | n | Positive<br>(%) |     | n |           |
| Allspice                          | ×                            | 0.0 | 1              | ●               | 100 | 1 | ×               | 0.0 | 1 | [10]      |
| Anise                             | ×                            | 0.0 | 1              | ×               | 0.0 | 1 | ×               | 0.0 | 1 | [10]      |
| Basil                             | ×                            | 0.0 | 1              | ×               | 0.0 | 1 | ×               | 0.0 | 1 | [10]      |
| Bay leaf                          | ×                            | 0.0 | 1              | ×               | 0.0 | 1 | ●               | 100 | 1 | [10]      |
| Caraway                           | ×                            | 0.0 | 1              | ×               | 0.0 | 1 | ●               | 100 | 1 | [10]      |
| Cardamom                          | ×                            | 0.0 | 1              | ×               | 0.0 | 1 | ●               | 100 | 1 | [10]      |
| Chili                             | ●                            | 100 | 1              | ●               | 100 | 1 | ●               | 100 | 1 | [10]      |
| Cinnamon                          | ●                            | 100 | 1              | ●               | 100 | 1 | ●               | 100 | 1 | [10]      |
| Cloves                            | ●                            | 100 | 1              | ×               | 0.0 | 1 | ●               | 100 | 1 | [10]      |
| Coriander                         | ×                            | 0.0 | 1              | ×               | 0.0 | 1 | ●               | 100 | 1 | [10]      |
| Cumin                             | ×                            | 0.0 | 1              | ×               | 0.0 | 1 | ●               | 100 | 1 | [10]      |
| Fennel                            | ×                            | 0.0 | 1              | ×               | 0.0 | 1 | ●               | 100 | 1 | [10]      |
| Fenugreek                         | ×                            | 0.0 | 1              | ×               | 0.0 | 1 | ●               | 100 | 1 | [10]      |
| Garlic                            | ×                            | 0.0 | 1              | ●               | 100 | 1 | ●               | 100 | 1 | [10]      |
| Ginger                            | ●                            | 100 | 1              | ●               | 100 | 1 | ●               | 100 | 1 | [10]      |
| Licorice                          | -                            | -   | 0              | ●               | 100 | 1 | -               | -   | 0 | [141]     |
| Marjoram                          | ×                            | 0.0 | 1              | ×               | 0.0 | 1 | ●               | 100 | 1 | [10]      |
| Mint                              | ×                            | 0.0 | 1              | ●               | 100 | 1 | ●               | 100 | 1 | [10]      |
| Nutmeg                            | ×                            | 0.0 | 1              | ●               | 100 | 1 | ●               | 100 | 1 | [10]      |
| Onion                             | ×                            | 0.0 | 1              | ●               | 100 | 1 | ●               | 100 | 1 | [10]      |
| Oregano                           | ×                            | 0.0 | 1              | ●               | 100 | 1 | ●               | 100 | 1 | [10]      |
| Paprika                           | ●                            | 100 | 2              | ●               | 100 | 2 | ●               | 100 | 2 | [10,107]  |
| Parsley                           | ×                            | 0.0 | 1              | ×               | 0.0 | 1 | ×               | 0.0 | 1 | [10]      |
| Pepper, black                     | ×                            | 0.0 | 1              | ●               | 100 | 1 | ●               | 100 | 1 | [10]      |
| Pepper, white                     | ×                            | 0.0 | 1              | ●               | 100 | 1 | ●               | 100 | 1 | [10]      |
| Rosemary                          | ×                            | 0.0 | 1              | ×               | 0.0 | 1 | ●               | 100 | 1 | [10]      |
| Sage                              | ×                            | 0.0 | 1              | ●               | 100 | 1 | ●               | 100 | 1 | [10]      |
| Sumac                             | ×                            | 0.0 | 1              | ●               | 100 | 1 | ●               | 100 | 1 | [10]      |
| Thyme                             | ×                            | 0.0 | 1              | ×               | 0.0 | 1 | ●               | 100 | 1 | [10]      |
| Turmeric                          | ●                            | 100 | 1              | ×               | 0.0 | 1 | ●               | 100 | 1 | [10]      |

Notes: <sup>a</sup> ALT = Alternuene, AOH = Alternariol, TEA = Tenuazonic acid; <sup>b</sup> Positive = the percentage of studies with at least one related spice sample positive on related mycotoxin; <sup>c</sup> n = a total number of studies concerning related spice and mycotoxin; × = none occurrence (0 %); ☆ = rare occurrence (up to 5 %); ○ = low occurrence (up to 25 %); ● = moderate occurrence (up to 50 %); ● = high occurrence (up to 75 %); ● = very high occurrence (more than 75 %).
